# Supplementary material for: Measuring hydraulic fracture apertures: a comparison of methods
Source: Copernicus journal article supplement (doi:10.5194/se-11-2411-2020), 2020-12-11
Supplement: Supplementary file 1 [file se-11-2411-2020-supplement.zip]

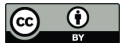

## *Supplement of*

# **Measuring hydraulic fracture apertures: a comparison of methods**

**Chaojie Cheng et al.**

*Correspondence to:* Harald Milsch ([milsch@gfz-potsdam.de](mailto:milsch@gfz-potsdam.de))

- [se-11-2411-2020-supplement-title-page.pdf](#)
- [Cheng et al SE Supplementary Material.xlsx](#)

The copyright of individual parts of the supplement might differ from the CC BY 4.0 License.
